# Supplementary material for: Immunization with an SIV-based IDLV Expressing HIV-1 Env 1086 Clade C Elicits Durable Humoral and Cellular Responses in Rhesus Macaques
Source: PubMed Central journal article supplement (PMC5154473; doi:10.1038/mt.2016.123), 2016-07-26
Supplement: mt2016123x1.pdf [file mt2016123x1.pdf]

Figure S1

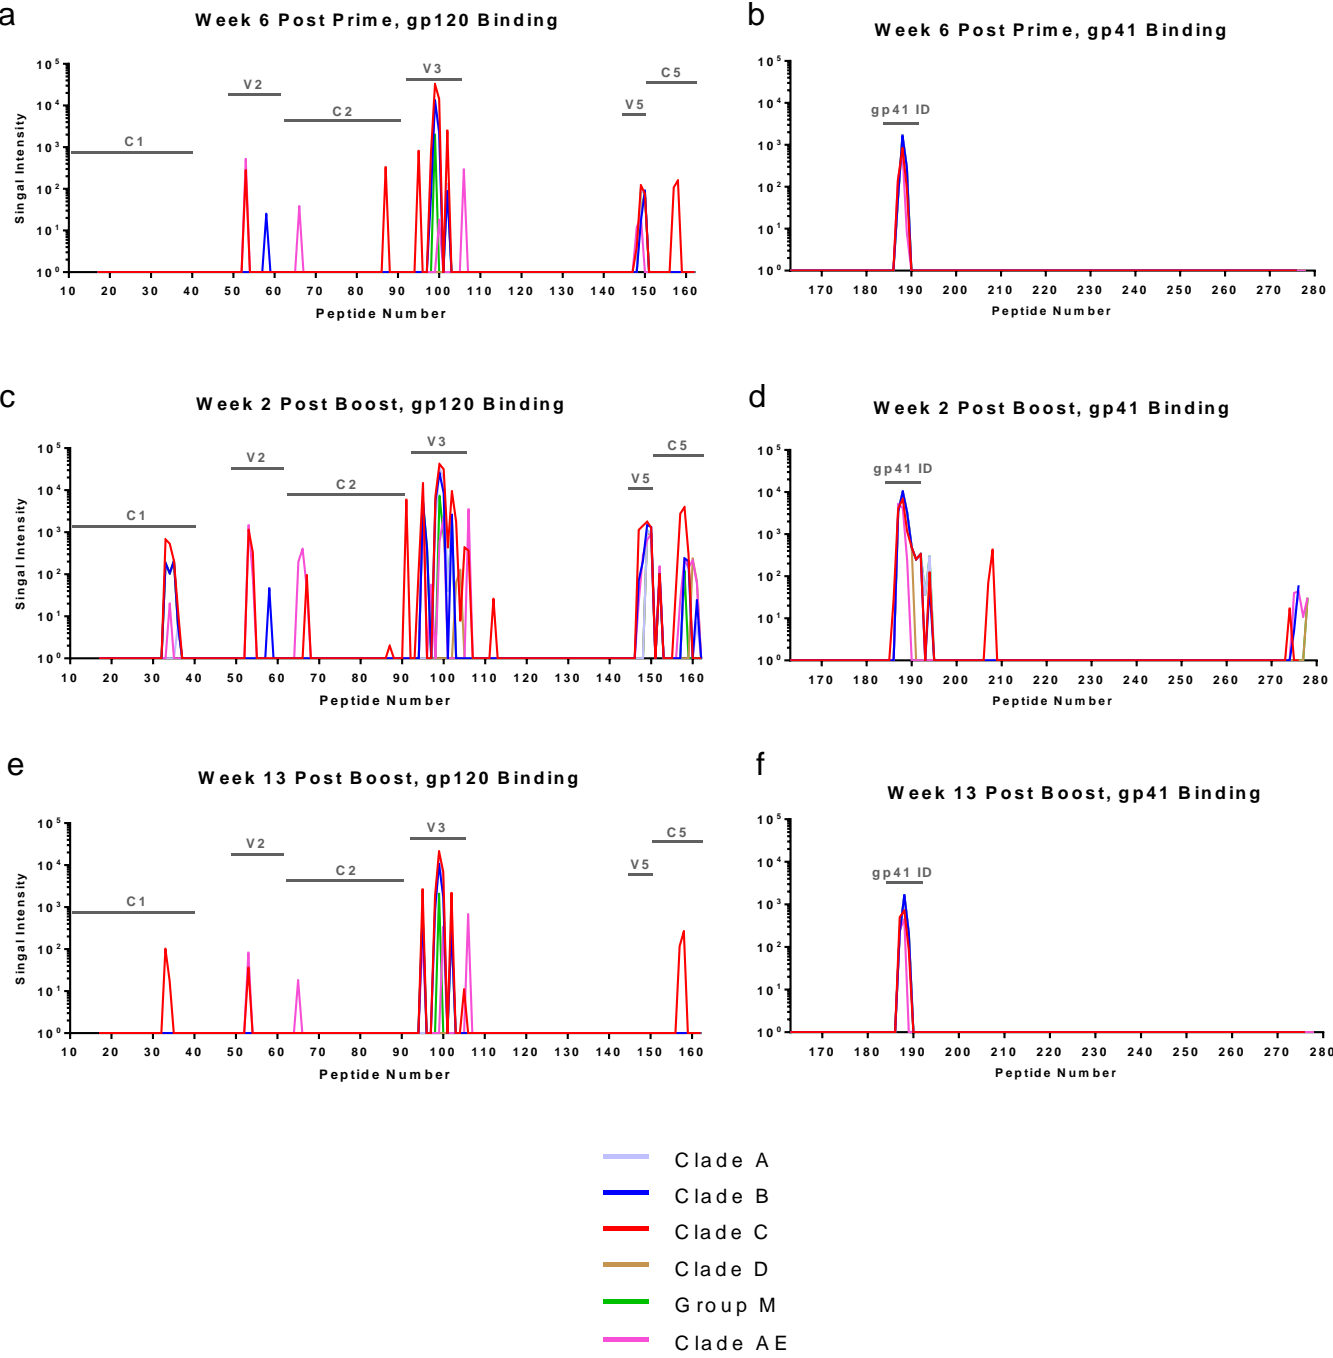

**Figure S1.** Median binding intensity of the 6 animals immunized against cross-clade gp120 (left) and gp41 (right) sequences, at 2 weeks post prime (a-b), 6 weeks (c-d) and 13 weeks (e-f) post boost.
